# Supplementary material for: Host–microbial interactions differ with age of asthma onset
Source: PubMed Central journal article supplement (PMC11375513; doi:10.1183/13993003.00428-2024), 2024-09-05

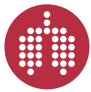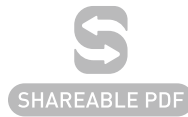

# Host–microbial interactions differ with age of asthma onset

Ali Versi<sup>1</sup>, Adnan Azim <sup>2</sup>, Fransiskus Xaverius Ivan<sup>3</sup>, Mahmoud I. Abdel-Aziz <sup>4</sup>, Stewart Bates<sup>5</sup>, John Riley<sup>5</sup>, Anke H. Maitland-Van Der Zee<sup>4</sup>, Sven-Erik Dahlen<sup>6</sup>, Ratko Djukanovic<sup>2</sup>, Sanjay H. Chotirmall <sup>3,7</sup>, Peter Howarth <sup>2</sup>, Nazanin Zounemat Kermani<sup>1</sup>, Kian Fan Chung<sup>1</sup> and Ian M. Adcock <sup>1</sup>, on behalf of the U-BIOPRED study group

<sup>1</sup>National Heart and Lung Institute and Data Science Institute, Imperial College London, London, UK. <sup>2</sup>Faculty of Medicine, Southampton University, Southampton, UK. <sup>3</sup>Lee Kong Chian School of Medicine, Nanyang Technological University, Singapore, Singapore. <sup>4</sup>Amsterdam University Medical Centers, Department of Pulmonary Medicine, University of Amsterdam, Amsterdam, The Netherlands. <sup>5</sup>Respiratory Therapeutic Unit, GSK, Stockley Park, UK. <sup>6</sup>Department of Medicine Huddinge, Karolinska Institutet, Stockholm, Sweden. <sup>7</sup>Department of Respiratory and Critical Care Medicine, Tan Tock Seng Hospital, Singapore, Singapore.

Corresponding author: Ian M. Adcock ([ian.adcock@imperial.ac.uk](mailto:ian.adcock@imperial.ac.uk))

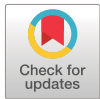

Shareable abstract (@ERSpublications)

The host immune response to pathogens differs between early- and late-onset asthma <https://bit.ly/3xSa4Fe>

**Cite this article as:** Versi A, Azim A, Ivan FX, *et al.* Host–microbial interactions differ with age of asthma onset. *Eur Respir J* 2024; 64: 2400428 [DOI: 10.1183/13993003.00428-2024].

This extracted version can be shared freely online.

Copyright ©The authors 2024.

This version is distributed under the terms of the Creative Commons Attribution Licence 4.0. For reproduction rights and permissions contact [permissions@ersnet.org](mailto:permissions@ersnet.org)

Received: 29 Feb 2024  
Accepted: 2 July 2024

*To the Editor:*

Asthma is a heterogenous disease [1] and dichotomisation between childhood/early-onset (EO) and adult/late-onset (LO) disease [2] identified differences in lung function decline and response to anti-inflammatory therapies, including biologics [3]. This suggests distinct inflammatory mechanisms underpin EO and LO asthma. In parallel, a relationship exists between airway neutrophilia and the airway microbiome [4, 5]. We postulate that differences in host–microbial interactions are associated with the age of asthma onset and would be maintained over time. Here, we applied a recently described machine learning framework, sparse canonical correlation analysis (Sparse-CCA) [6], to identify differences in host–microbial interactions in the airways of EO and LO asthma.

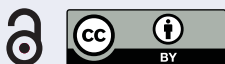

Supplement: ERJ-00428-2024.Shareable.pdf [file ERJ-00428-2024.Shareable.pdf]
